# Supplementary material for: Nitric Oxide and a Conditioned Medium Affect the Hematopoietic Development in a Microfluidic Mouse Embryonic Stem Cell/OP9 Co-Cultivation System
Source: MDPI journal article supplement (doi:10.3390/mi11030305), 2020-03-14
Supplement: s1 [file s1]

Supplementary Materials:

# Nitric Oxide and a Conditioned Medium Affect the Hematopoietic Development in a Microfluidic Mouse Embryonic Stem Cell/OP9 Co-Cultivation System

Kae Sato, Momoko Maeda, Eriko Kamata, Sayaka Ishii, Kanako Yanagisawa, Kenji Kitajima and Takahiko Hara

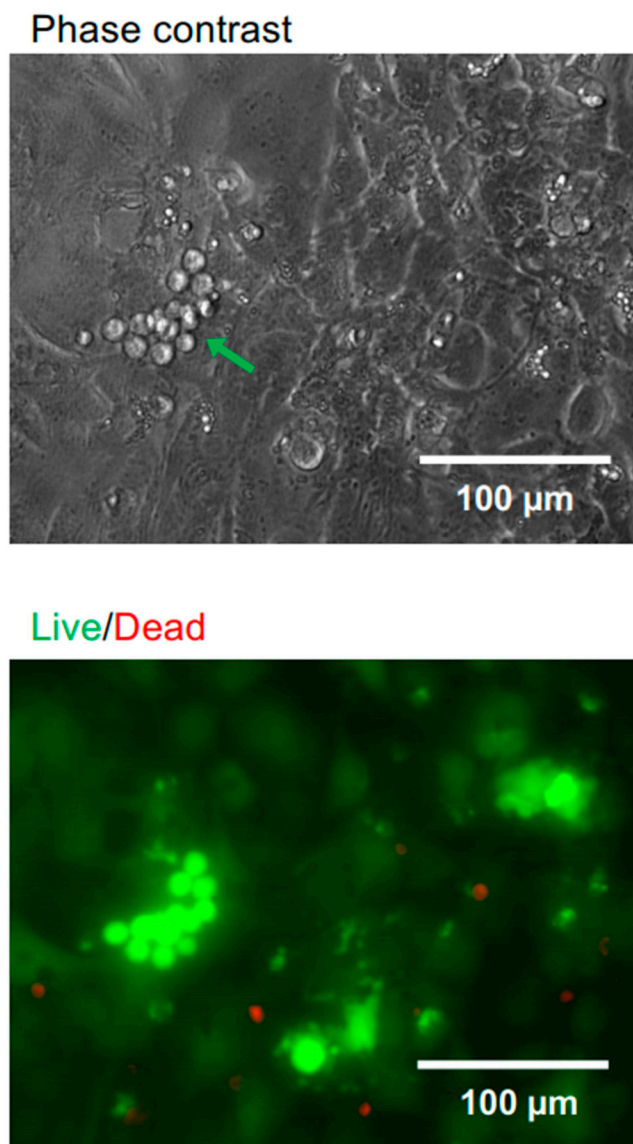

**Figure S1.** Phase contrast and live/dead images of the blood cells and OP9 cells. Arrowheads indicate blood cells. Live/dead assay staining indicated that most of cells within the microfluidic channel were alive.

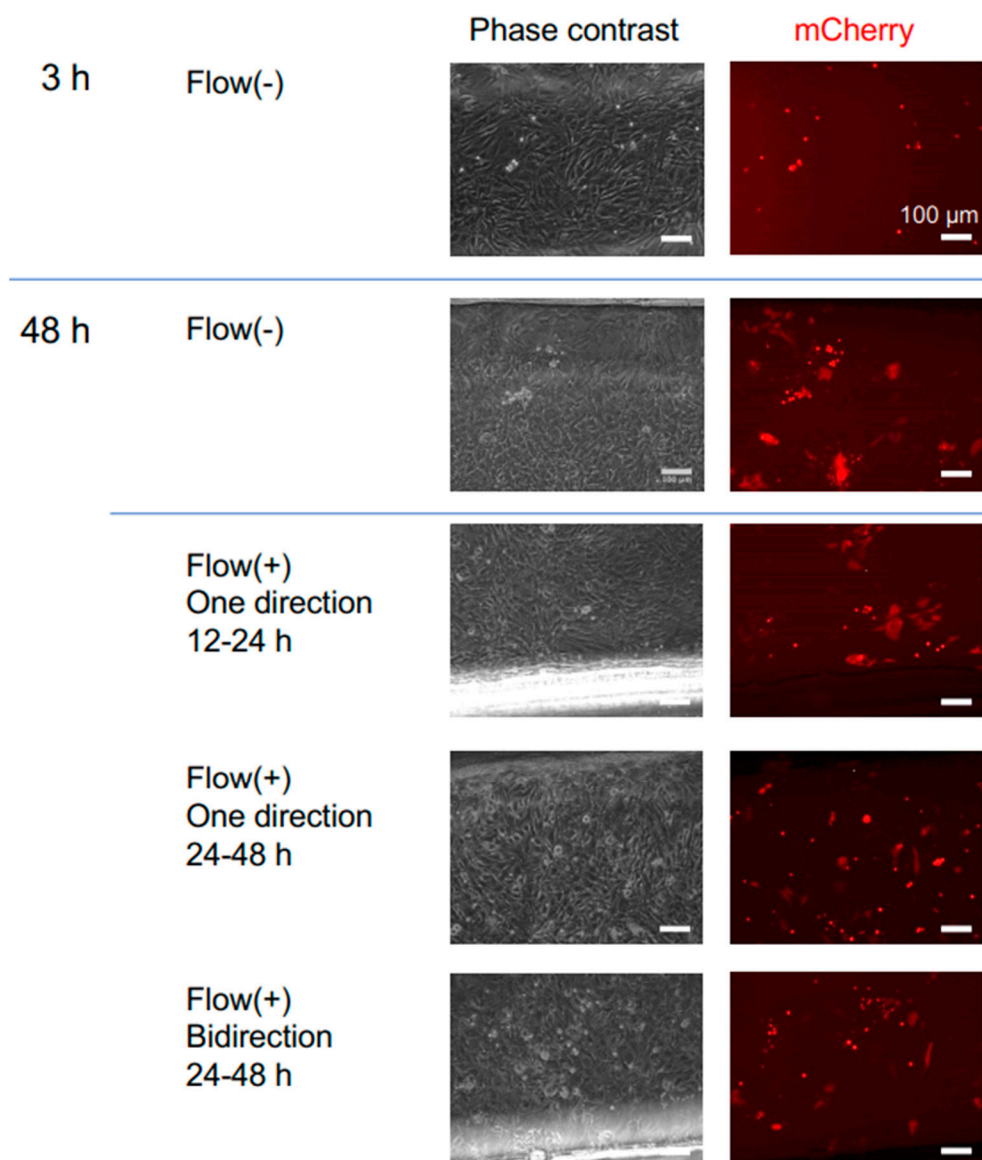

**Figure S2.** Observation of mCherry embryonic stem cells (ESCs) before and after flow culture. To visualize Flk-1+ cells, dox-inducible mCherry ESCs (A2lox.cre ES) were used instead of E14tg2aESCs. Cell culture protocol was the same as the standard protocol except for addition of doxycycline. Flk-1+ cells from dox-inducible mCherry ESCs were seeded on OP9 cells in the channel. After incubation, the cells were cultured under fluidic or static conditions. Cells were cultured under 4 conditions: static condition, unidirectional flow conditions from 12–24 h, unidirectional flow conditions from 24–48 h, and bidirectional flow conditions from 24–48 h. The status of the cells was observed with a microscope 3 and 48 h after seeding.

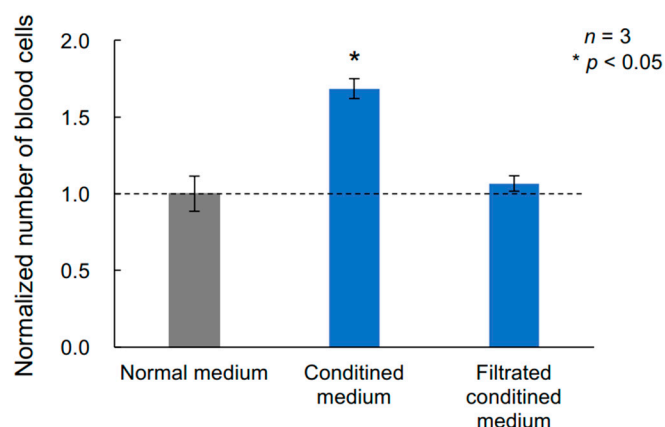

**Figure S3.** Effects of filtered conditioned medium. The number of blood cells generated in normal, conditioned, and filtered conditioned medium are shown. Filtered conditioned medium was prepared by filtering conditioned medium through a disposable centrifugal ultrafiltration device (molecular weight cutoff 10 kDa; Amicon Ultra-0.5 mL Centrifugal Filters Ultracel-10K; EMD Millipore, Billerica, MA, USA). The filtered conditioned medium was supplemented with 20% FBS and used as Flk-1+ cell culture medium. The medium was replaced 5 and 22 h after being seeded with Flk-1+ cells.

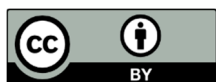

© 2020 by the authors. Submitted for possible open access publication under the terms and conditions of the Creative Commons Attribution (CC BY) license (<http://creativecommons.org/licenses/by/4.0/>).
